# Supplementary material
Source: PubMed Central journal article supplement (PMC5461788)
Supplement: ASN.2016060662SupplementaryData.pdf [file ASN.2016060662SupplementaryData.pdf]

Table S1 Clinical characteristics of patients enrolled in GCKD (n=5217)

| Parameter                                           | Value          |
|-----------------------------------------------------|----------------|
| Age, years, median (range)                          | 63 (18-76)     |
| Gender, male/female                                 | 3132/2085      |
| Weight, kg, mean±SD                                 | 88±19          |
| Height, cm, mean±SD                                 | 171±9          |
| Body mass index, kg/m <sup>2</sup> , median (range) | 29 (16-70)     |
| Office SBP, mmHg, mean±SD                           | 140±20         |
| Office DBP, mmHg, mean±SD                           | 79±12          |
| Hypertension – (%)                                  | 96             |
| Treatment resistant hypertension – (%)              | 24             |
| Number of BP medications, mean                      | 2.8            |
| ACE-inhibitor – (%)                                 | 46             |
| ARB – (%)                                           | 41             |
| Betablocker – (%)                                   | 59             |
| Calcium channel antagonist – (%)                    | 36             |
| Diuretic – (%)                                      | 52             |
| Thiazide diuretic – (%)                             | 13             |
| Loop diuretic – (%)                                 | 41             |
| Aldosterone antagonist – (%)                        | 9              |
| Diabetes mellitus – (%)                             | 36             |
| Coronary artery disease – (%)                       | 20             |
| Cerebrovascular disease – (%)                       | 10             |
| Peripheral vascular disease – (%)                   | 9              |
| Diabetic nephropathy (%)                            | 27             |
| Vascular nephropathy – (%)                          | 41             |
| Systemic disease affecting the kidney – (%)         | 12             |
| Primary glomerulopathy – (%)                        | 23             |
| Serum creatinine, mg/dl, median (range)             | 1.5 (0.45-7.0) |
| eGFR, ml/min/1.73m <sup>2</sup> , median (range)    | 46 (8-136)     |
| UACR , mg/g creatinine, median (range)              | 52 (1-15,784)  |

Table S2 Clinical characteristics stratified according to skin water in RSI (1H-MRI)

| Parameter                                           | Skin water         |                                 |                      | P-Value |
|-----------------------------------------------------|--------------------|---------------------------------|----------------------|---------|
|                                                     | <0.099 RSI<br>N=29 | 0.099 to<br>0.14667 RSI<br>N=32 | >0.14667 RSI<br>N=30 |         |
| Age, years, median (range)                          | 54 (23-76)         | 68 (36-75)                      | 69 (47-78)           | <0.001  |
| Gender, male/female                                 | 11/18              | 17/15                           | 24/6                 | 0.004   |
| Weight, kg, mean (95%-CI)                           | 80 (74-87)         | 83 (78-88)                      | 95 (89-101)          | 0.002   |
| Height, cm, mean (95%-CI)                           | 172 (168-175)      | 170 (166-173)                   | 174 (171-178)        | 0.155   |
| Body mass index, kg/m <sup>2</sup> , median (range) | 26 (18-37)         | 28 (21-41)                      | 30 (23-39)           | 0.007   |
| Office SBP, mmHg, mean (95%-CI)                     | 126 (121-131)      | 135 (129-140)                   | 136 (131-142)        | 0.016   |
| Office DBP, mmHg, mean (95%-CI)                     | 80 (76-84)         | 82 (79-86)                      | 78 (73-83)           | 0.330   |
| 24h-SBP, mmHg, mean (95%-CI)                        | 121 (118-125)      | 126 (122-129)                   | 131 (126-136)        | 0.005   |
| 24h-DBP, mmHg, mean (95%-CI)                        | 76 (74-80)         | 77 (74-81)                      | 76 (73-80)           | 0.893   |
| Hypertension – (%)                                  | 86                 | 87                              | 100                  | 0.114   |
| Treatment resistant hypertension – (%)              | 7                  | 13                              | 23                   | 0.184   |
| Number of BP medications, median (range)            | 1 (0-4)            | 2 (0-5)                         | 4 (0-6)              | <0.001  |
| ACE-inhibitor – (%)                                 | 38                 | 25                              | 37                   | 0.490   |
| ARB – (%)                                           | 35                 | 47                              | 57                   | 0.231   |
| Betablocker – (%)                                   | 31                 | 13                              | 63                   | <0.001  |
| Calcium channel antagonist – (%)                    | 14                 | 34                              | 70                   | <0.001  |
| Diuretic – (%)                                      | 21                 | 44                              | 78                   | <0.001  |
| Aldosterone antagonist – (%)                        | 3                  | 3                               | 10                   | 0.416   |
| Diabetes mellitus – (%)                             | 3                  | 34                              | 50                   | <0.001  |
| Coronary artery disease – (%)                       | 3                  | 6                               | 17                   | 0.164   |
| Cerebrovascular disease – (%)                       | 0                  | 0                               | 13                   | 0.014   |
| Peripheral vascular disease – (%)                   | 3                  | 6                               | 0                    | 0.387   |
| Diabetic nephropathy (%)                            | 3                  | 19                              | 40                   | 0.002   |
| Vascular nephropathy – (%)                          | 24                 | 25                              | 33                   | 0.678   |
| Systemic disease – (%)                              | 14                 | 9                               | 23                   | 0.301   |
| Primary glomerulopathy – (%)                        | 31                 | 19                              | 20                   | 0.465   |
| Serum creatinine, mg/dl, median (range)             | 1.2 (0.7-2.0)      | 1.3 (0.6-2.5)                   | 1.5 (0.8-4.3)        | 0.066   |
| eGFR, ml/min/1.73m <sup>2</sup> , median (range)    | 53 (27-127)        | 55 (19-97)                      | 48 (13-86)           | 0.078   |
| UACR, mg/g creatinine, median (range)               | 37 (1-1147)        | 10 (2-1519)                     | 63 (2-2670)          | 0.130   |

Table S3 Clinical characteristics stratified according to muscle sodium in mmol/L (<sup>23</sup>Na-MRI)

| Parameter                                           | Muscle sodium        |                                |               | P-Value |
|-----------------------------------------------------|----------------------|--------------------------------|---------------|---------|
|                                                     | <15.2 mmol/L<br>N=28 | 15.2 to 17.6<br>mmol/L<br>N=33 | >17.6<br>N=31 |         |
| Age, years, median (range)                          | 57 (25-75)           | 67 (23-78)                     | 69 (46-75)    | <0.001  |
| Gender, male/female                                 | 15/13                | 18/15                          | 19/12         | 0.803   |
| Weight, kg, mean (95%-CI)                           | 78 (71-84)           | 87 (81-94)                     | 92 (87-97)    | 0.003   |
| Height, cm, mean (95%-CI)                           | 171 (167-175)        | 171 (167-175)                  | 173 (171-176) | 0.598   |
| Body mass index, kg/m <sup>2</sup> , median (range) | 26 (18-36)           | 29 (20-41)                     | 32 (23-39)    | 0.004   |
| Office SBP, mmHg, mean (95%-CI)                     | 132 (126-137)        | 129 (124-134)                  | 138 (132-143) | 0.047   |
| Office DBP, mmHg, mean (95%-CI)                     | 83 (79-87)           | 78 (74-81)                     | 81 (77-86)    | 0.134   |
| 24h-SBP, mmHg, mean (95%-CI)                        | 124 (120-129)        | 124 (121-128)                  | 129 (124-135) | 0.136   |
| 24h-DBP, mmHg, mean (95%-CI)                        | 78 (75-82)           | 75 (73-78)                     | 78 (74-81)    | 0.382   |
| Hypertension – (%)                                  | 89                   | 88                             | 97            | 0.407   |
| Treatment resistant hypertension – (%)              | 11                   | 6                              | 26            | 0.063   |
| Number of BP medications, median (range)            | 2 (0-5)              | 2 (0-5)                        | 3 (0-6)       | 0.016   |
| ACE-inhibitor – (%)                                 | 36                   | 33                             | 29            | 0.856   |
| ARB – (%)                                           | 36                   | 42                             | 58            | 0.204   |
| Betablocker – (%)                                   | 32                   | 24                             | 48            | 0.121   |
| Calcium channel antagonist – (%)                    | 25                   | 33                             | 58            | 0.024   |
| Diuretic – (%)                                      | 32                   | 46                             | 65            | 0.043   |
| Aldosterone antagonist – (%)                        | 7                    | 3                              | 7             | 0.744   |
| Diabetes mellitus – (%)                             | 21                   | 18                             | 48            | 0.016   |
| Coronary artery disease – (%)                       | 4                    | 12                             | 10            | 0.484   |
| Cerebrovascular disease – (%)                       | 0                    | 3                              | 10            | 0.171   |
| Peripheral vascular disease – (%)                   | 0                    | 0                              | 10            | 0.047   |
| Diabetic nephropathy (%)                            | 11                   | 21                             | 29            | 0.221   |
| Vascular nephropathy – (%)                          | 25                   | 24                             | 36            | 0.547   |
| Systemic disease – (%)                              | 18                   | 3                              | 26            | 0.036   |
| Primary glomerulopathy – (%)                        | 18                   | 30                             | 19            | 0.438   |
| Serum creatinine, mg/dl, median (range)             | 1.3 (0.8-2.0)        | 1.3 (0.6-2.4)                  | 1.3 (0.8-4.3) | 0.520   |
| eGFR, ml/min/1.73m <sup>2</sup> , median (range)    | 53 (34-100)          | 51 (25-127)                    | 49 (13-86)    | 0.415   |
| UACR, mg/g creatinine, median (range)               | 10 (2-1519)          | 63 (1-1319)                    | 21 (2-2670)   | 0.297   |

Table S4 Clinical characteristics stratified according to muscle water in RSI (1H-MRI)

| Parameter                                           | Muscle water         |                                   |                      | P-Value |
|-----------------------------------------------------|----------------------|-----------------------------------|----------------------|---------|
|                                                     | <0.48867 RSI<br>N=30 | 0.48867 to<br>0.51133 RSI<br>N=31 | >0.51133 RSI<br>N=30 |         |
| Age, years, median (range)                          | 66 (28-76)           | 61 (23-76)                        | 69 (25-78)           | 0.220   |
| Gender, male/female                                 | 18/12                | 16/15                             | 18/12                | 0.746   |
| Weight, kg, mean (95%-CI)                           | 91 (85-97)           | 83 (77-90)                        | 84 (78-90)           | 0.136   |
| Height, cm, mean (95%-CI)                           | 172 (168-176)        | 170 (167-173)                     | 174 (171-176)        | 0.395   |
| Body mass index, kg/m <sup>2</sup> , median (range) | 30 (23-41)           | 28 (18-39)                        | 26 (20-37)           | 0.050   |
| Office SBP, mmHg, mean (95%-CI)                     | 130 (125-135)        | 130 (126-135)                     | 137 (131-144)        | 0.083   |
| Office DBP, mmHg, mean (95%-CI)                     | 80 (76-84)           | 81 (78-84)                        | 80 (75-84)           | 0.930   |
| 24h-SBP, mmHg, mean (95%-CI)                        | 128 (124-132)        | 123 (120-126)                     | 128 (122-133)        | 0.116   |
| 24h-DBP, mmHg, mean (95%-CI)                        | 77 (73-81)           | 76 (74-78)                        | 78 (74-82)           | 0.766   |
| Hypertension – (%)                                  | 100                  | 84                                | 90                   | 0.081   |
| Treatment resistant hypertension – (%)              | 10                   | 10                                | 23                   | 0.224   |
| Number of BP medications, median (range)            | 3 (0-6)              | 1 (0-5)                           | 3 (0-5)              | 0.059   |
| ACE-inhibitor – (%)                                 | 40                   | 32                                | 27                   | 0.544   |
| ARB – (%)                                           | 47                   | 42                                | 50                   | 0.817   |
| Betablocker – (%)                                   | 47                   | 16                                | 43                   | 0.023   |
| Calcium channel antagonist – (%)                    | 37                   | 32                                | 50                   | 0.339   |
| Diuretic – (%)                                      | 57                   | 36                                | 50                   | 0.237   |
| Aldosterone antagonist – (%)                        | 7                    | 7                                 | 3                    | 0.817   |
| Diabetes mellitus – (%)                             | 30                   | 23                                | 37                   | 0.484   |
| Coronary artery disease – (%)                       | 13                   | 7                                 | 7                    | 0.562   |
| Cerebrovascular disease – (%)                       | 3                    | 3                                 | 7                    | 0.760   |
| Peripheral vascular disease – (%)                   | 7                    | 3                                 | 0                    | 0.351   |
| Diabetic nephropathy (%)                            | 27                   | 13                                | 23                   | 0.385   |
| Vascular nephropathy – (%)                          | 30                   | 26                                | 27                   | 0.928   |
| Systemic disease – (%)                              | 23                   | 7                                 | 17                   | 0.183   |
| Primary glomerulopathy – (%)                        | 20                   | 32                                | 17                   | 0.312   |
| Serum creatinine, mg/dl, median (range)             | 1.4 (0.6-2.5)        | 1.2 (0.7-2.4)                     | 1.3 (0.8-4.3)        | 0.868   |
| eGFR, ml/min/1.73m <sup>2</sup> , median (range)    | 49 (19-94)           | 54 (25-127)                       | 53 (13-100)          | 0.760   |
| UACR, mg/g creatinine, median (range)               | 35 (1-994)           | 37 (2-1519)                       | 25 (2-2670)          | 0.777   |
